# Supplementary material for: Quality of Protein Isolates and Hydrolysates from Baltic Herring (Clupea harengus membras) and Roach (Rutilus rutilus) Produced by pH-Shift Processes and Enzymatic Hydrolysis
Source: MDPI journal article supplement (doi:10.3390/foods11020230), 2022-01-15
Supplement: s1 [file s1]

## Supplementary Material

The supporting information is provided: (1) Schematic representation of the production of protein isolates and hydrolysates (**Figure S1**).

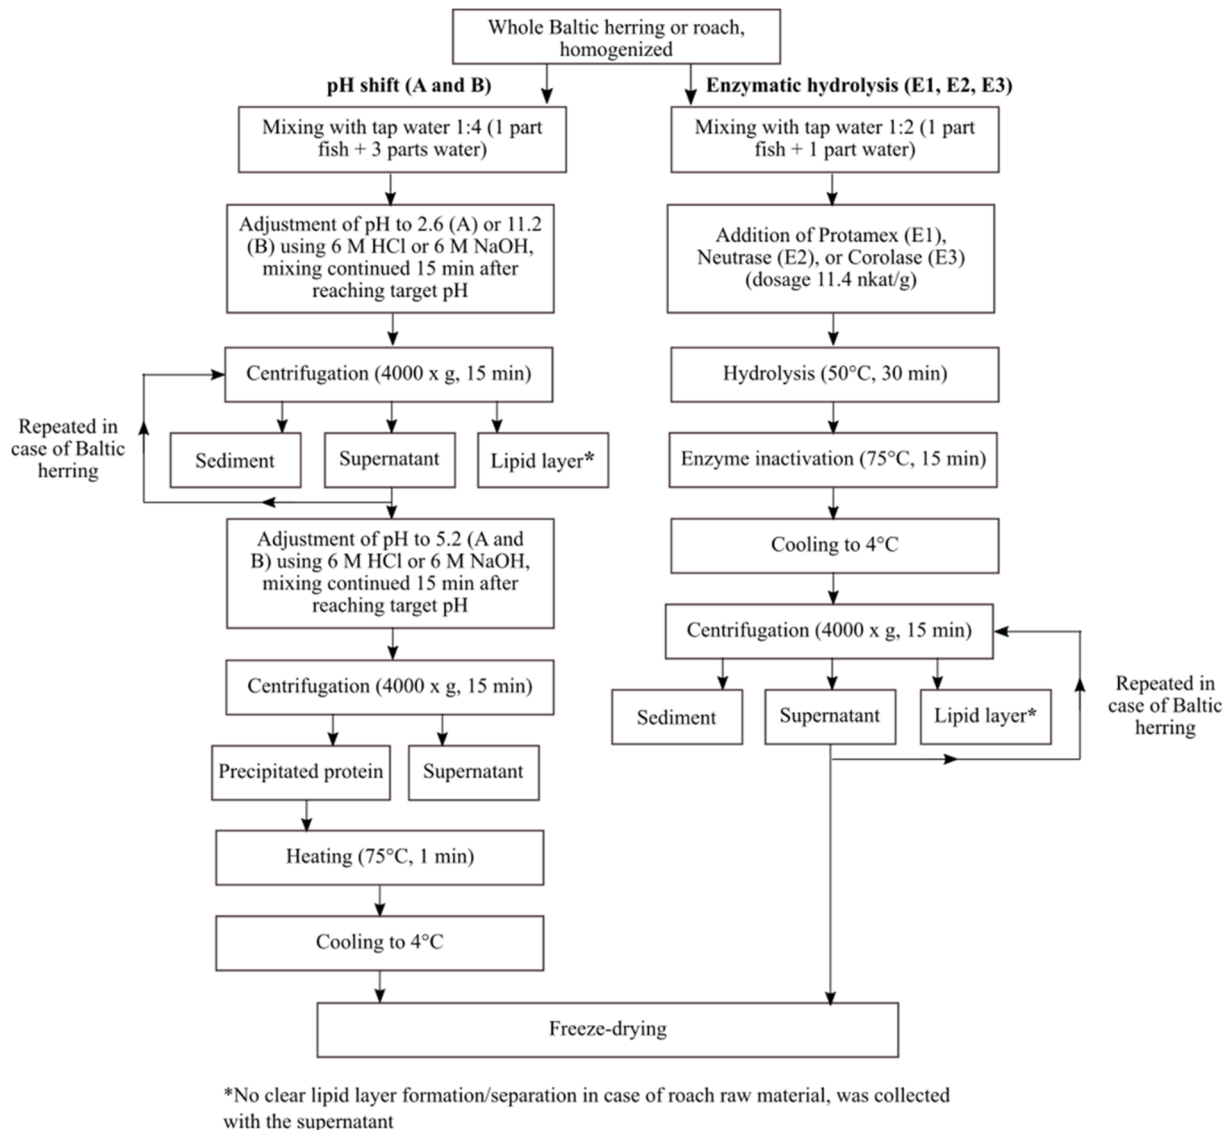

**Figure S1.** Schematic representation of acidic (A) and alkaline (B) pH shift process and enzymatic hydrolysis using Protamex (E1), Neutrase (E2), or Corolase (E3), as previously reported by Nisov et al. [20]. Unless stated otherwise, processing was conducted at 4°C and under continuous mixing (75 rpm).
